# Supplementary material for: Application of IPSET-thrombosis in 1366 Patients Prospectively Followed From the Spanish Registry of Essential Thrombocythemia
Source: PubMed Central journal article supplement (PMC10356121; doi:10.1097/hs9.0000000000000936), 2023-07-18
Supplement: hs9-7-e936-s001.pdf [file hs9-7-e936-s001.pdf]

## SUPPLEMENTAL FIGURE 1

### RISK STRATIFICATION AT DIAGNOSIS

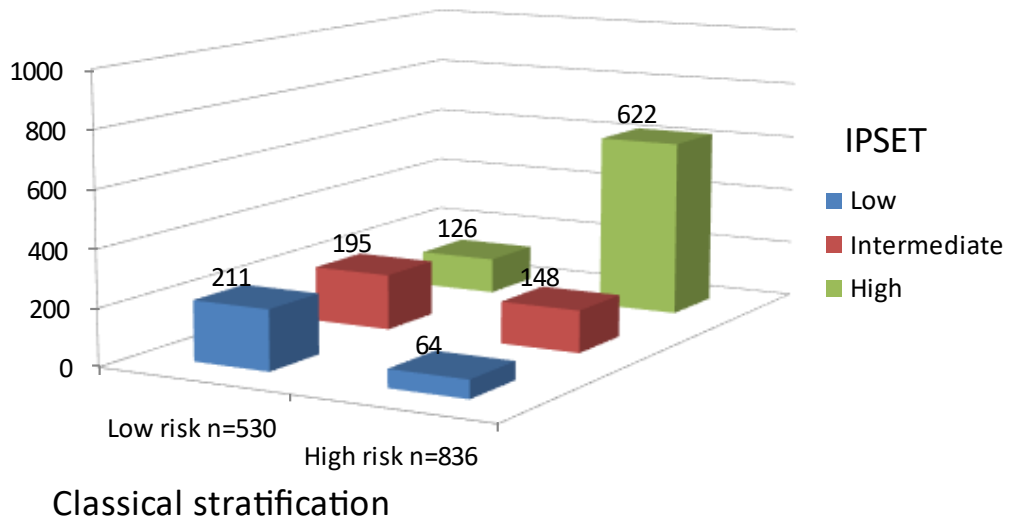

## SUPPLEMENTAL FIGURE 2

### RISK STRATIFICATION AT DIAGNOSIS

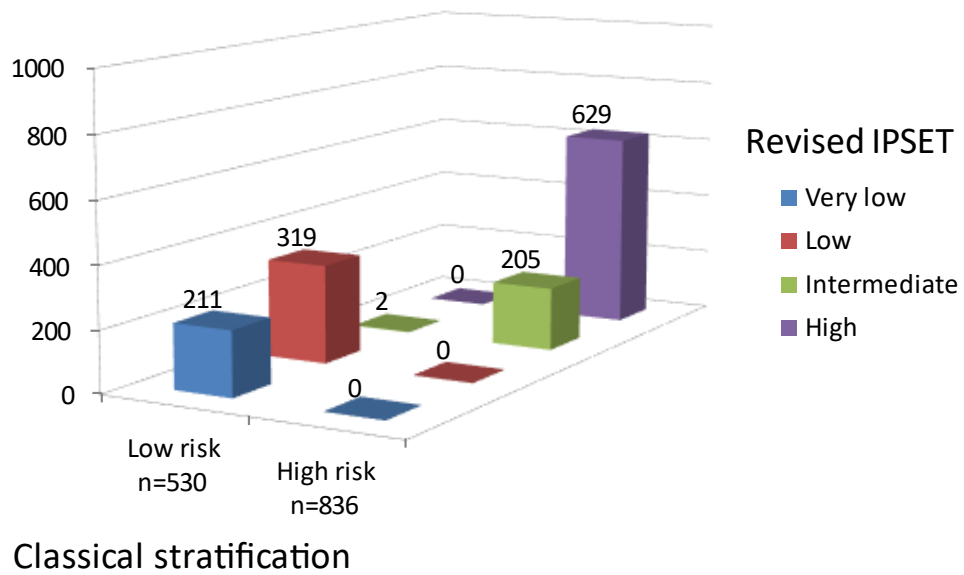

### SUPPLEMENTAL FIGURE 3

### RISK STRATIFICATION AT DIAGNOSIS

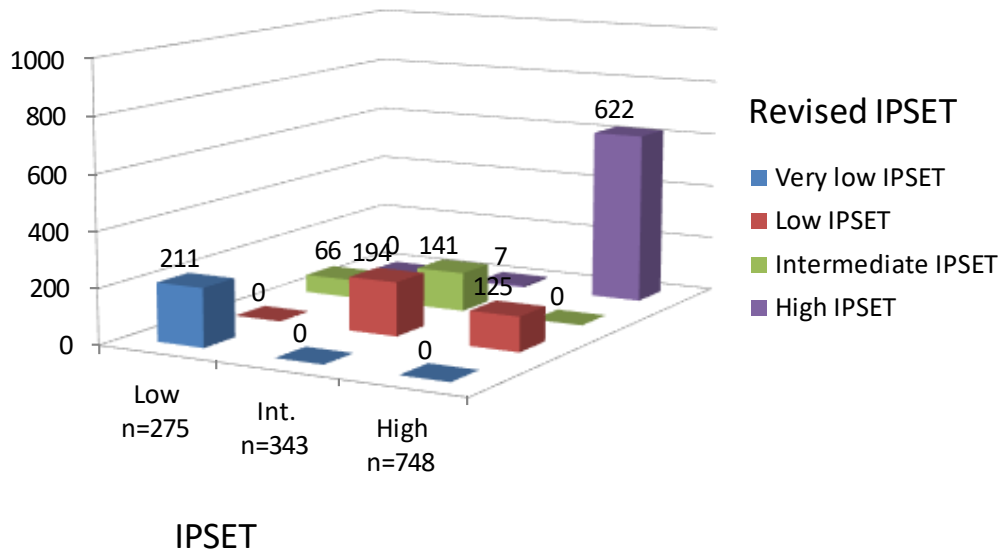

## SUPPLEMENTAL FIGURE 4

Survival according to the risk categories of IPSET-thrombosis, revised IPSET-thrombosis and the classic 2-tier model for the stratification of thrombotic risk in ET. The table summarizes the hazard ratios (HR) and their 95% confidence intervals (CI) as compared with the reference risk category.

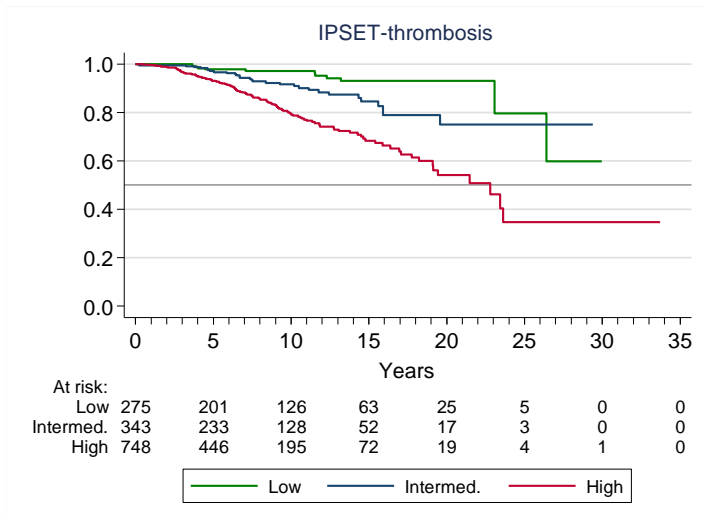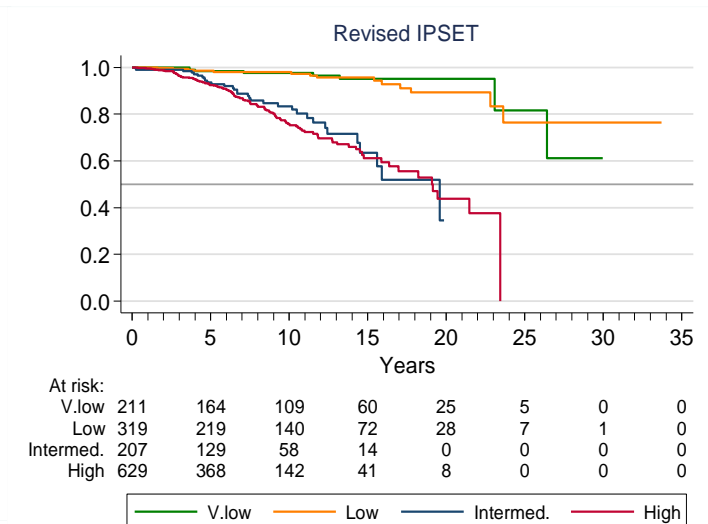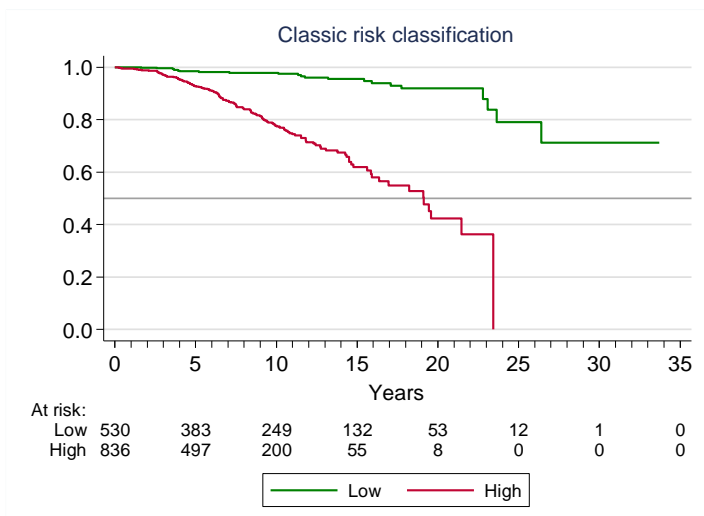

| Risk category                                            | HR (95% CI)     | p       |
|----------------------------------------------------------|-----------------|---------|
| <b>IPSET (reference category: low-risk)</b>              |                 |         |
| Intermed.                                                | 2.4 (1.2 – 4.7) | 0.01    |
| High                                                     | 5.6 (3.1 – 10)  | < 0.001 |
| <b>Revised IPSET (reference category: very low risk)</b> |                 |         |
| Low                                                      | 1.2 (0.5 – 3.0) | 0.6     |
| Intermed.                                                | 8.9 (4.0 – 18)  | < 0.001 |
| High                                                     | 10.4 (5.0 – 22) | < 0.001 |
| <b>Classic (reference category: low-risk)</b>            |                 |         |
| High                                                     | 8.8 (5.4 – 14)  | < 0.001 |
